# Supplementary material
Source: PubMed Central journal article supplement (PMC3435172)
Supplement: 1206093109_pnas.201206093SI.pdf [file 1206093109_pnas.201206093SI.pdf]

# Supporting Information

Deogracias et al. 10.1073/pnas.1206093109

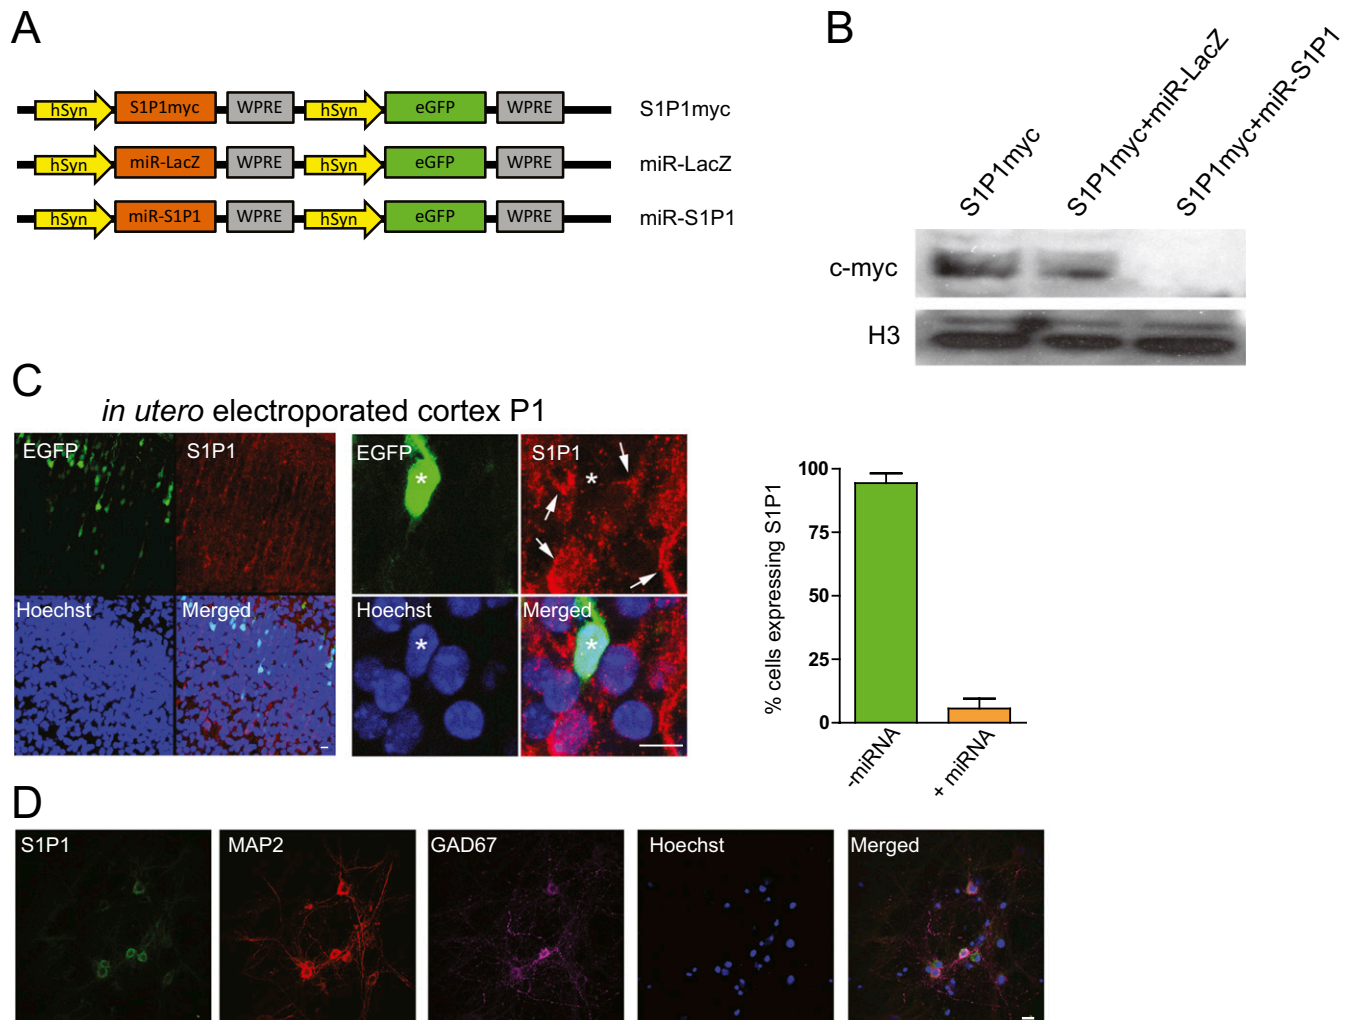

**Fig. S1.** Validation of anti-S1P1 antibodies. (A) Dual h-Synapsin-promoter (1) driving the expression of S1P1myc-tagged, miRNA against  $\beta$ -galactosidase (miR-LacZ), or miRNA against S1P1 from the first promoter, and eGFP from the second. (B) Validation of the miR-S1P1 expressing vector by Western blot on co-transfected HEK cells. (C) Immunohistochemistry using S1P1 antibodies on brain slices of P1 mice *in utero* electroporated at E14.5 with the miR-S1P1 expressing vector showed absence of S1P1 on transfected (eGFP positive) neurons. (D) Quantification of the number of neurons immunoreactive for S1P1 antibodies ( $n = 250$ ). P1 mice transfected by *in utero* electroporation (E14.5) showed a reduction in the number of neurons expressing miRNA-S1P1 (eGFP positive) and S1P1. Cells stained with S1P1 receptor antibodies (green), MAP2 (red), GAD67 (magenta) and the Hoechst nuclear stain (blue). (Scale bar: 10  $\mu$ m.) Note the lack of correlation between S1P1 receptor and neuronal subtype.

1. Gascón S, Paez-Gomez JA, Díaz-Guerra M, Scheiffele P, Scholl FG (2008) Dual-promoter lentiviral vectors for constitutive and regulated gene expression in neurons. *J Neurosci Methods* 168:104–112.

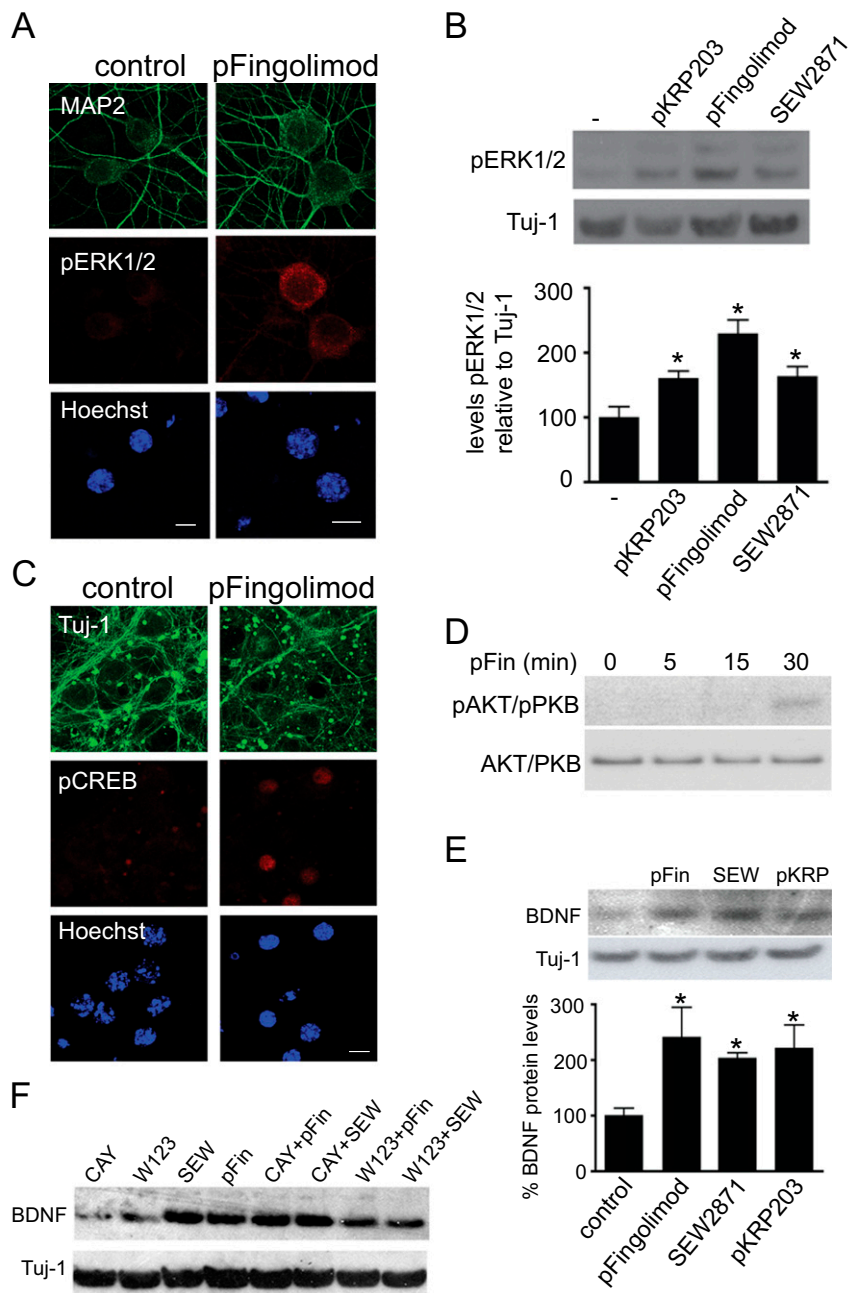

**Fig. 52.** Increased phosphorylation of ERK1/2, CREB, and AKT by modulation of S1P1 receptors. (A) Antibody staining showing neuro-specific phosphorylation of ERK1/2 after 30 min stimulation with phospho-fingolimod (10 nM). MAP2 was used to label neurons. Nuclei were stained with Hoechst. (B) Thirty minutes stimulation of cortical cultures with the specific S1P1 receptor agonists pKRP203 and SEW2871 lead to increased pERK1/2 (Mean  $\pm$  SEM,  $n = 3$ ,  $*P < 0.05$  Student's  $t$  test). (C) Rapid phosphorylation of AKT in cultured neurons after 30 min of stimulation with phospho-fingolimod (10 nM). (D) Cortical neurons stimulated with pFTY720 for 30 min lead to increased pCREB-Ser133 immunoreactivity in the nucleus. Neurons were labeled with  $\beta$ -III-Tubulin (Tuj1) antibodies and nuclei with Hoechst. (E) BDNF protein levels were increased in cortical neurons treated with the S1P1 agonists SEW2871 and pKRP203 compared with nonstimulated cultures. Graph represents the mean  $\pm$  SEM of three independent experiments. ( $*P < 0.05$  Student's  $t$  test). (F) The presence of the S1P1 antagonist W123, but not of the S1P3 antagonist CAY10444, abrogated the increased on BDNF levels after 24 h of treatment with phospho-fingolimod and SEW2871.

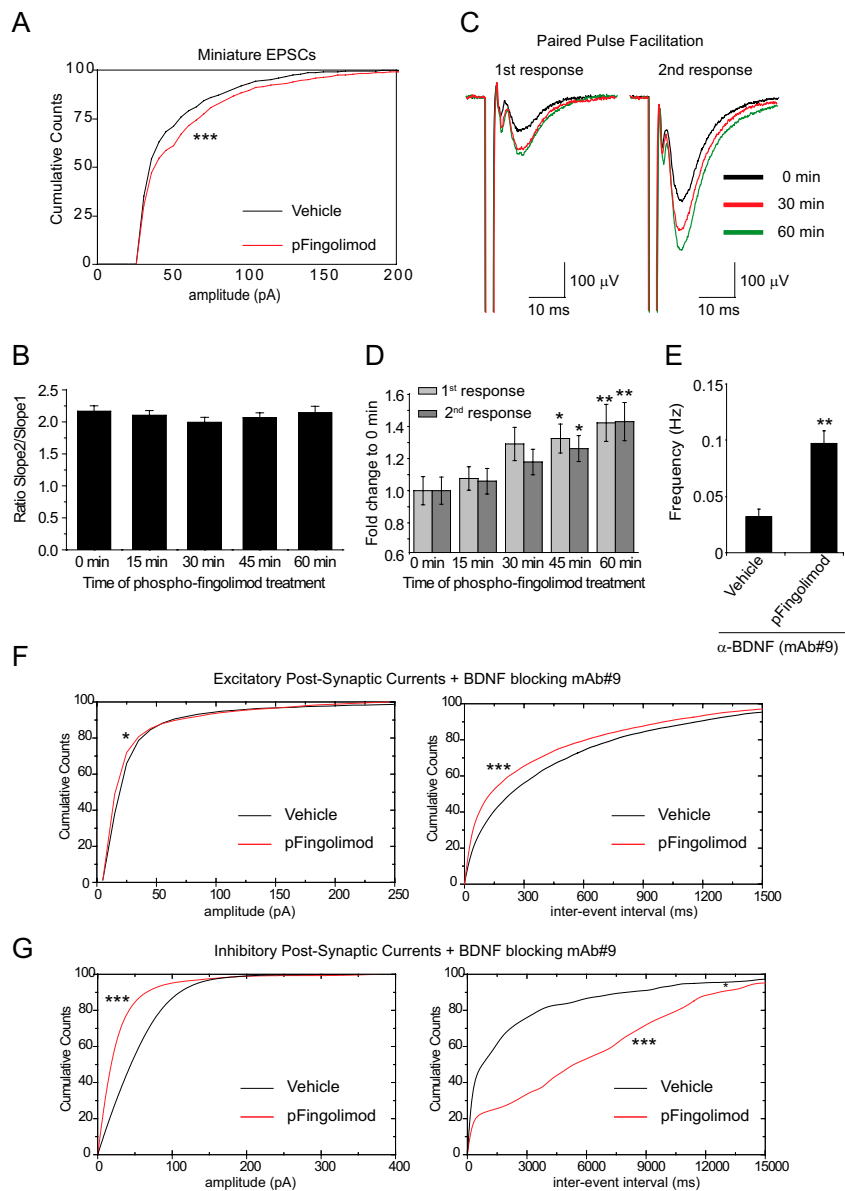

**Fig. S3.** Phospho-fingolimod increases postsynaptic excitability. (A) Phospho-fingolimod increases the average amplitude of miniature EPSCs ( $***P < 0.001$ ; Kolmogorov–Smirnov test), whereas the frequency was not changed (5.8 vs. 4.3 Hz;  $P = 0.31$ ; Student  $t$  test; 14 recorded cells per condition). (B) The ratio between the slopes did not alter ( $P = 0.57$ , Repeated measures one-way ANOVA, 8 recorded cells per condition). (C) Paired-pulse facilitation experiments on acute hippocampal slices confirmed an increase in excitability (each trace is an average of a 5-min recording). (D) The phospho-fingolimod induced increase in excitability was only observed at time points later than 30 min ( $*P < 0.05$ ,  $**P < 0.01$ , Repeated measures one-way ANOVA, followed by Tukey’s post hoc test, 8 recorded cells per condition). (E) In spontaneous activity recordings of DIV14–16 cortical cultures in the presence of the mAb#9 BDNF blocking antibody, the frequency of excitatory bursts was increased after phospho-fingolimod treatment ( $**P < 0.01$ , Student  $t$  test, 23 recorded cells per condition). (F) The mAb#9 BDNF blocking antibody reverses the phospho-fingolimod induced increase in EPSC amplitudes, while the interevent interval was still reduced ( $*P < 0.05$ ,  $***P < 0.001$ , one-sided Kolmogorov–Smirnov test, 23 recorded cells per condition). (G) The IPSC amplitude is reduced after phospho-fingolimod treatment in the presence of the mAb#9 BDNF blocking antibody, whereas the interevent interval is increased ( $***P < 0.001$ , one-sided Kolmogorov–Smirnov test, 23 recorded cells per condition).

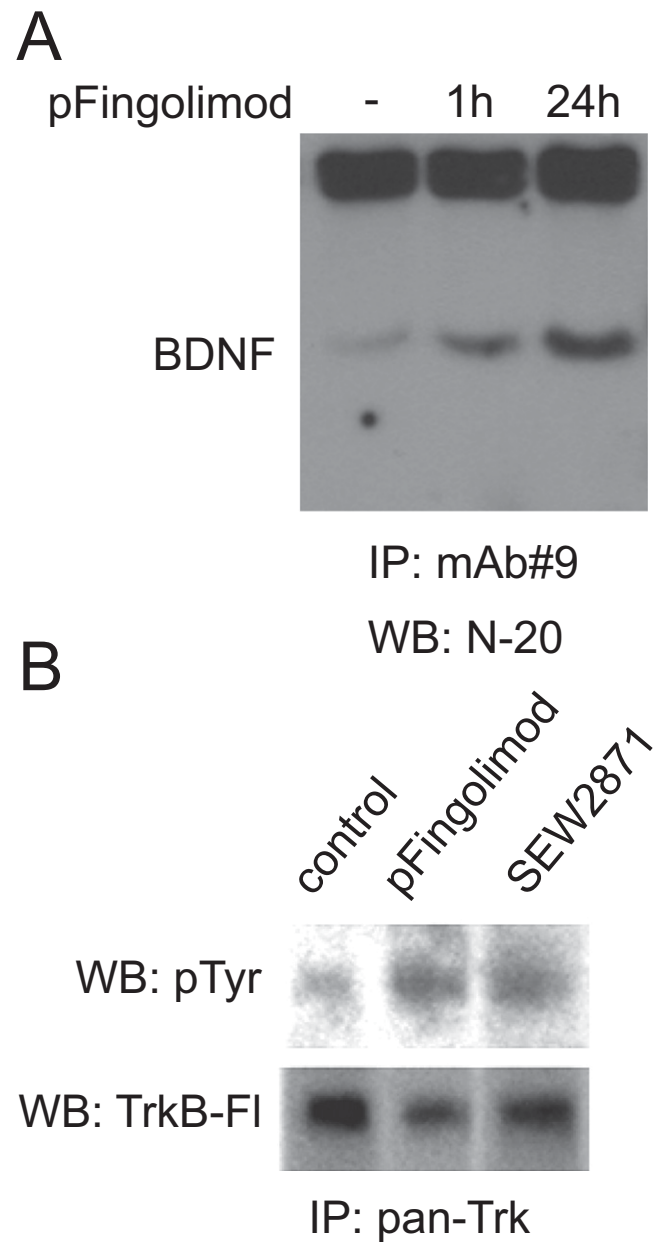

**Fig. 54.** Increased BDNF secretion and TrkB phosphorylation by phospho-fingolimod. (A) Cortical neurons (DIV14) were treated with phospho-fingolimod (10 nM) for 1 or 24 h with the BDNF antibody mAb#9 (12  $\mu$ g/mL) added to the medium 1h before treatment. The medium was collected, immunoprecipitated and analyzed by Western blot using the BDNF antibody N-20. (B) Immunoprecipitation with pan-Trk antibodies, followed by detection with phospho-tyrosine and TrkB-FI antibodies. Note the increase in phospho-TrkB levels after phospho-fingolimod and SEW2871 treatment for 1 h.

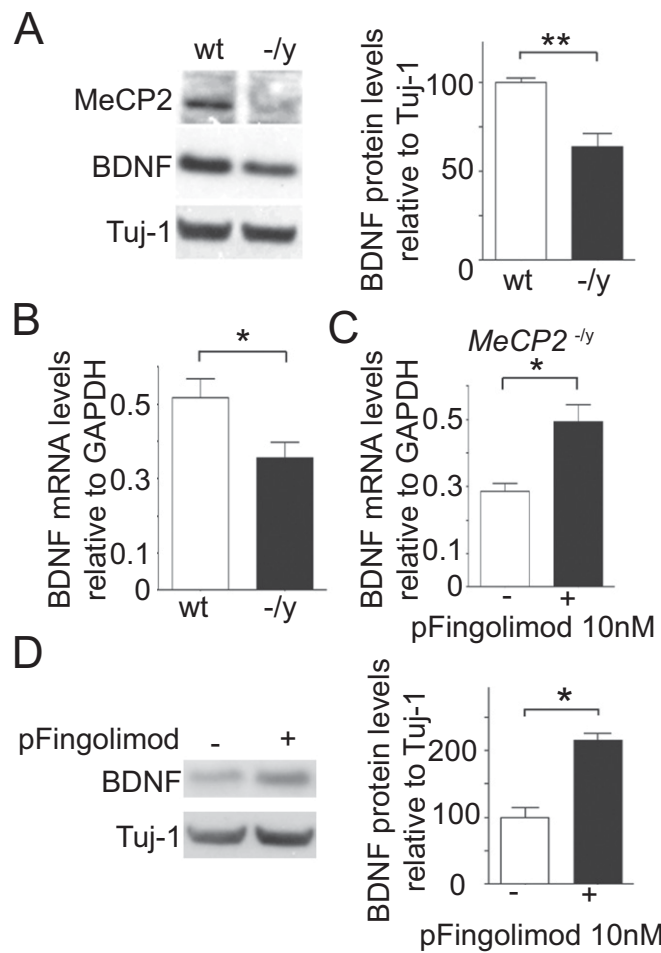

**Fig. 55.** Phospho-fingolimod increases BDNF levels in neurons derived from *Mecp2*<sup>-/-</sup> ES cells. (A and B) *Mecp2*<sup>-/-</sup> ES cell-derived neurons (14 DIV) show reduced BDNF levels as observed by Western blot (A) and qPCR (B) assays. (C and D) Stimulation of *Mecp2*<sup>-/-</sup> ESCDN with phospho-fingolimod (10 nM, 4 h) increases BDNF mRNA levels (C) and protein levels (D) after 16 h (means  $\pm$  SEM,  $n = 3$ ,  $*P < 0.05$  Student's *t* test).
